# Supplementary material for: Simple and Rapid Preparation of MIL-121 with Small Particles for Lithium Adsorption from Brine
Source: MDPI journal article supplement (doi:10.3390/coatings11070854), 2021-07-15
Supplement: s1 [file s1]

Archive with 1 entries (1 files):
- coatings-1259387-supplementary.pdf
